# Supplementary material for: Pupil Mimicry is the Result of Brightness Perception of the Iris and Pupil
Source: PubMed Central journal article supplement (PMC6634366; doi:10.5334/joc.34), 2018-06-19
Supplement: joc-1-1-34-s1.pdf [file joc-1-1-34-s1.pdf]

Supplementary Materials

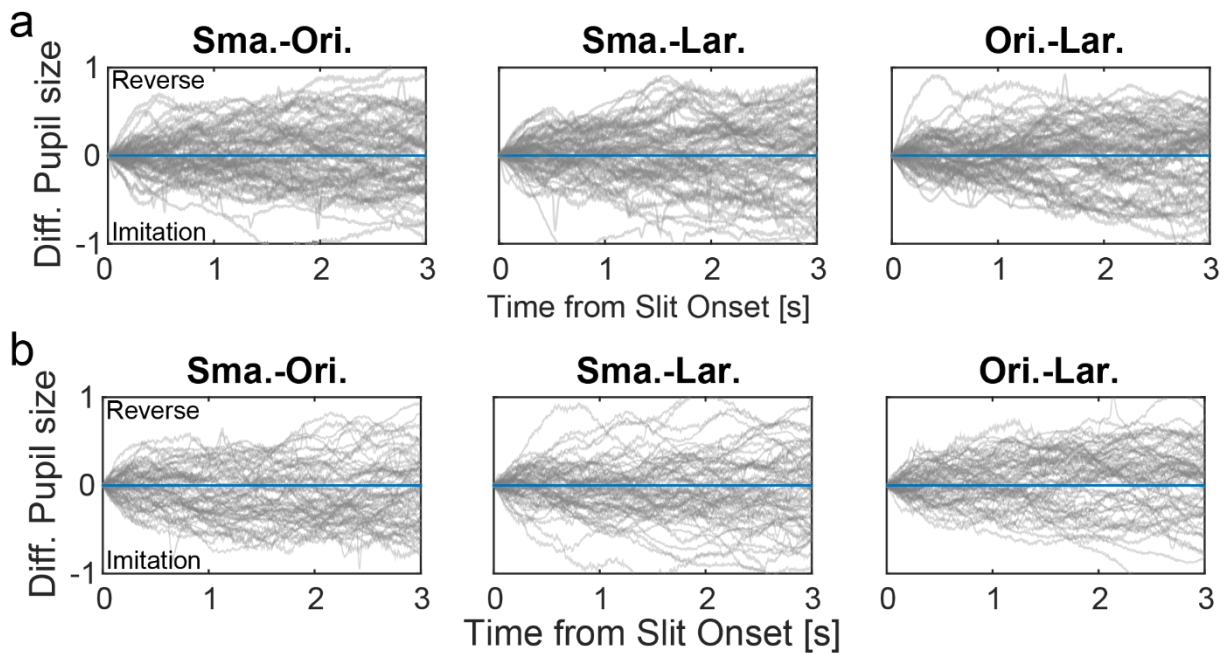

*Figure S1.* Difference in pupil size (z-value) as a function of time from onset of not equalized (a) or equalized (b) slit stimuli for small pupil minus original pupil size (left column), small minus large pupil size (middle column), and original minus large size (right column). The individual gray lines indicate the average difference per observer. Lines with negative values are in line with the pupil mimicry effect and lines with positive values indicate a reversed pupil mimicry effect.

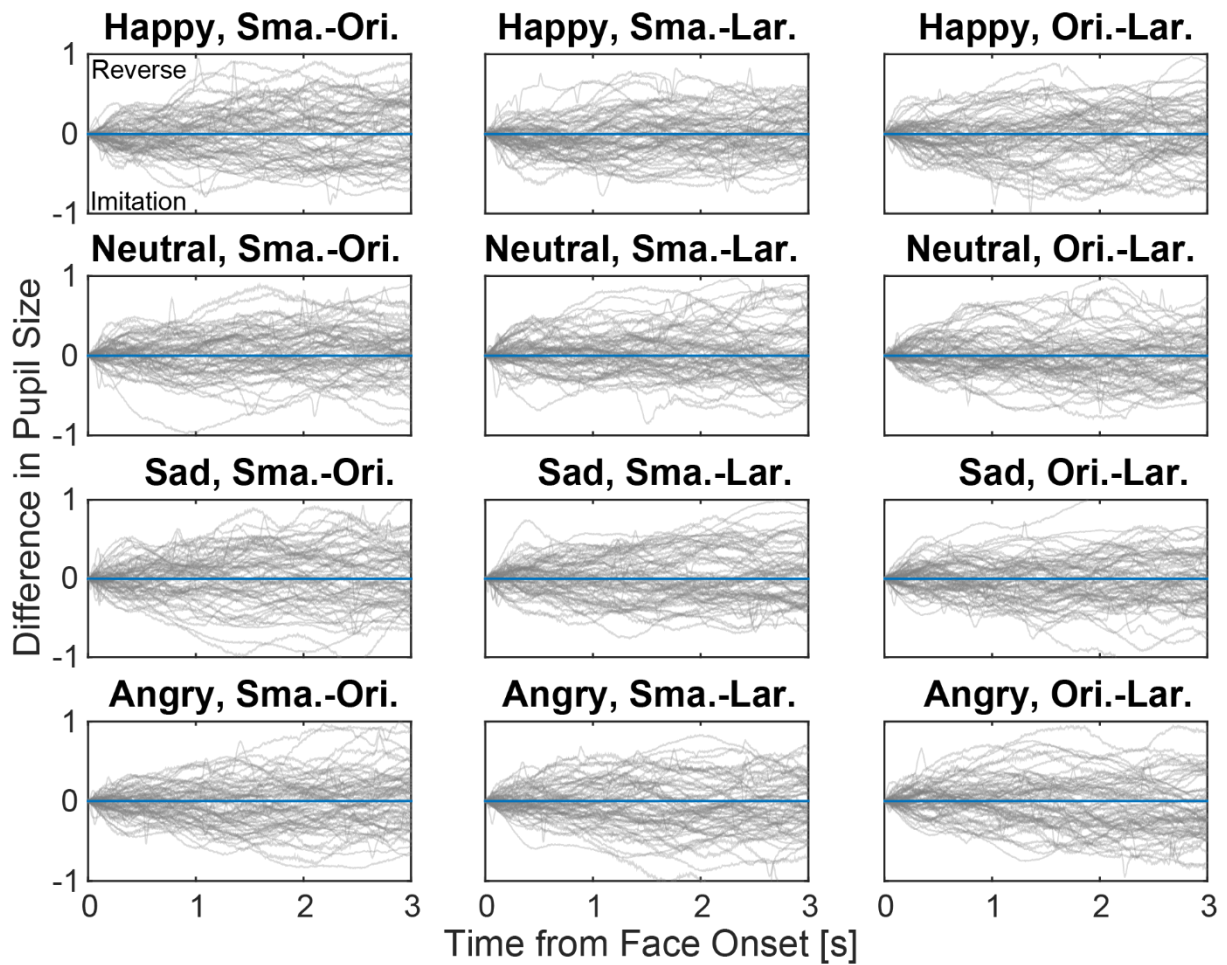

Figure S2. Same as Figure S1 but now for each observers' pupil responses to stimuli displaying full face images per emotional expression condition (rows).

Table S1.

Means, confidence intervals, and post-hoc *t*-test comparisons of average pupil size between pairs of emotion conditions of block 3 in experiment 1.

| Compared emotions | Mean difference | Confidence interval | <i>t</i> -value | <i>p</i> -value  | Cohen's <i>d</i> | <i>BF</i>      |
|-------------------|-----------------|---------------------|-----------------|------------------|------------------|----------------|
| Happy Neutral     | -0.015          | -0.06/0.03          | 0.69            | 0.490            | 0.059            | 0.178          |
| Happy Sad         | -0.075          | -0.13/-0.03         | 3.01            | <b>0.004</b>     | <b>0.267</b>     | <b>8.171</b>   |
| Happy Angry       | -0.097          | -0.15/-0.05         | 4.01            | <b>&lt;0.001</b> | <b>0.350</b>     | <b>132.733</b> |
| Neutral Sad       | -0.061          | -0.11/-0.01         | 2.40            | <b>0.019</b>     | <b>0.215</b>     | <b>1.982</b>   |
| Neutral Angry     | -0.082          | -0.12/-0.04         | 4.05            | <b>&lt;0.001</b> | <b>0.297</b>     | <b>150.299</b> |
| Sad Angry         | -0.022          | -0.07/0.02          | 0.89            | 0.379            | 0.070            | 0.205          |

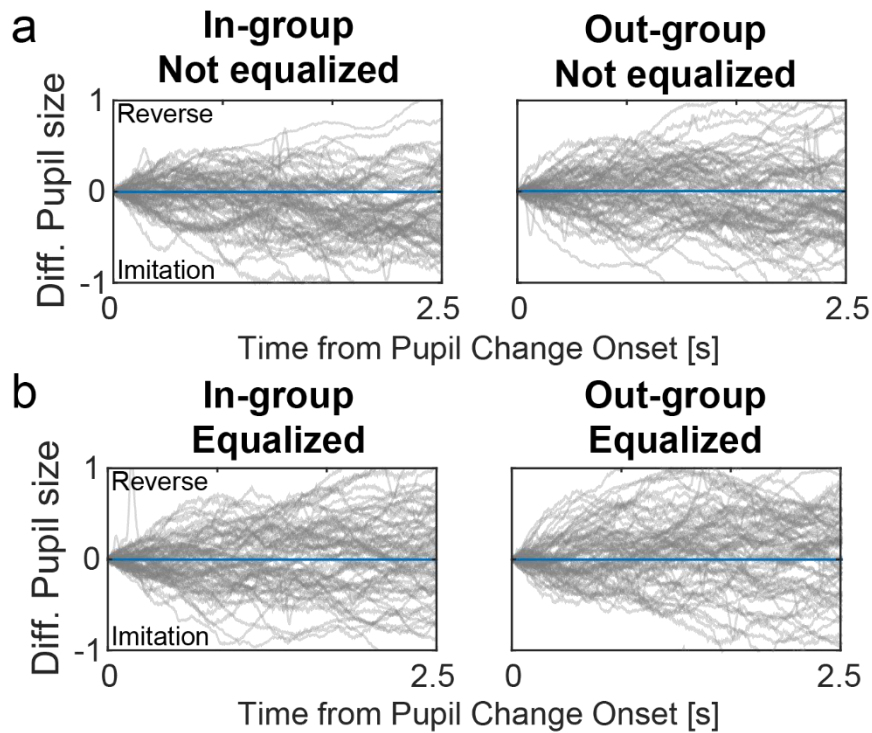

Figure S3. Same as Figure S1-S2 but now for each observers' pupil responses to stimuli displaying videos of slits of the eyes of in-group (left) or out-group persons (right) with dynamic pupil sizes that were either not equalized (a) or equalized for luminance (b) as a function of pupil size.

Table S2.

Results from a linear mixed-effects model with the factors time, observed pupil size, and luminance equalization.

| Fixed Effect                                        | <i>F</i> | <i>p</i>       |
|-----------------------------------------------------|----------|----------------|
| Intercept                                           | 0.006    | .941           |
| Time (linear trend)                                 | 25.371   | < <b>0.001</b> |
| Observed pupil size                                 | < 0.001  | .992           |
| Luminance equalization                              | 0.067    | .796           |
| Time × Observed pupil size                          | 2.886    | .089           |
| Time × Luminance equalization                       | 2.818    | .093           |
| Observed pupil size × Luminance equalization        | 0.071    | .790           |
| Time × Observed pupil size × Luminance equalization | 28.425   | < <b>.001</b>  |
